# Supplementary material for: The synthesis of three new Cu5, Cu8 and Cu12 clusters via the use of a semi-flexible aminotriazine-based bis-methylpyridine ligand
Source: Royal Society of Chemistry journal article supplement (doi:10.1039/c6dt04236h), 2016-12-19
Supplement: c6dt04236h1.pdf [file c6dt04236h1.pdf]

## The synthesis of Three New Cu<sub>5</sub>, Cu<sub>8</sub> and Cu<sub>12</sub> Clusters via the Use of a Semi-Flexible Aminotriazine-Based Bis-Methylpyridine Ligand

Chun-Hung Chiang,<sup>a</sup> Yen-Wen Tzeng,<sup>a</sup> Chen-I Yang,<sup>\*a</sup> Motohiro Nakano,<sup>b</sup> Long-Li Lai,<sup>\*c</sup> and Gene-Hsiang Lee<sup>d</sup>

<sup>a</sup>Department of Chemistry, Tunghai University, Taichung 407, Taiwan

<sup>b</sup>Division of Applied Chemistry, Graduate School of Engineering, Osaka University, 2-1 Yamada-oka, Suita, 565-0871, Japan

<sup>c</sup>Department of Applied Chemistry, National Chi Nan University, Nantou 545, Taiwan

<sup>d</sup>Department of Chemistry, National Taiwan University, Taipei, 106, Taiwan

|                 | Index                                                                                                                                                                                  | Page |
|-----------------|----------------------------------------------------------------------------------------------------------------------------------------------------------------------------------------|------|
| <b>Table 1S</b> | Selected bond distances (Å) and angles (°) for complexes <b>1–3</b> .                                                                                                                  | S2   |
| <b>Table 2S</b> | Bond valence sums for Cu <sup>a</sup> and selected oxygen <sup>b</sup> atoms in <b>1–3</b> .                                                                                           | S6   |
| <b>Fig. 1S</b>  | Representations of Cu <sub>5</sub> -based 1D supramolecular structure of <b>1</b> showing along the <i>b</i> axis. Hydrogen atoms have been omitted for clarity.                       | S8   |
| <b>Fig. 2S</b>  | Plot of $\chi_M^{-1}$ (○) vs. temperature for a microcrystalline sample of complex <b>1</b> . The solid line represents the best fit $\chi_M^{-1}$ above 150 K with a Curie–Weiss law. | S9   |
| <b>Fig. 3S</b>  | Diagram of all energy values for all <i>S<sub>T</sub></i> spin states of complex <b>1</b> .                                                                                            | S11  |
| <b>Fig. 4S</b>  | Plot of $\chi_M^{-1}$ (○) vs. temperature for a microcrystalline sample of complex <b>2</b> . The solid line represents the best fit $\chi_M^{-1}$ above 100 K with a Curie–Weiss law. | S12  |
| <b>Fig. 5S</b>  | Diagram of all energy values for all <i>S<sub>T</sub></i> spin states of complex <b>2</b> .                                                                                            | S13  |
| <b>Fig. 6S</b>  | Plot of $\chi_M^{-1}$ (○) vs. temperature for a microcrystalline sample of complex <b>3</b> . The solid line represents the best fit $\chi_M^{-1}$ above 160 K with a Curie–Weiss law. | S14  |

**Table 1S.** Selected bond distances (Å) and angles (°) for complexes **1–3**.

| <b>1</b>            |            |                   |            |
|---------------------|------------|-------------------|------------|
| Cu(1)-O(2)#1        | 1.987(3)   | Cu(2)-N(5)        | 2.071(3)   |
| Cu(1)-O(2)          | 1.987(3)   | Cu(2)-O(5)        | 2.574(4)   |
| Cu(1)-O(1)#1        | 2.032(2)   | Cu(2)-O(9)#1      | 2.706(3)   |
| Cu(1)-O(1)          | 2.032(2)   | Cu(3)-O(2)        | 1.905(3)   |
| Cu(1)-N(1)          | 2.333(3)   | Cu(3)-N(6)        | 1.965(3)   |
| Cu(1)-N(1)#1        | 2.333(3)   | Cu(3)-O(4)        | 1.994(3)   |
| Cu(2)-O(1)          | 1.906(3)   | Cu(3)-N(7)        | 2.110(3)   |
| Cu(2)-N(4)          | 1.974(3)   | Cu(3)-O(6)        | 2.565(3)   |
| Cu(2)-O(3)          | 1.984(3)   | Cu(3)-O(9)        | 2.636(3)   |
| O(2)#1-Cu(1)-O(2)   | 180.00(14) | N(5)-Cu(2)-O(5)   | 94.28(13)  |
| O(2)#1-Cu(1)-O(1)#1 | 93.20(10)  | O(1)-Cu(2)-O(9)#1 | 83.94(10)  |
| O(2)-Cu(1)-O(1)#1   | 86.80(10)  | N(4)-Cu(2)-O(9)#1 | 100.15(12) |
| O(2)#1-Cu(1)-O(1)   | 86.80(10)  | O(3)-Cu(2)-O(9)#1 | 94.48(12)  |
| O(2)-Cu(1)-O(1)     | 93.20(10)  | N(5)-Cu(2)-O(9)#1 | 77.00(12)  |
| O(1)#1-Cu(1)-O(1)   | 180.0      | O(5)-Cu(2)-O(9)#1 | 171.24(12) |
| O(2)#1-Cu(1)-N(1)   | 89.42(11)  | O(2)-Cu(3)-N(6)   | 173.16(14) |
| O(2)-Cu(1)-N(1)     | 90.58(11)  | O(2)-Cu(3)-O(4)   | 92.77(12)  |
| O(1)#1-Cu(1)-N(1)   | 88.43(11)  | N(6)-Cu(3)-O(4)   | 93.71(15)  |
| O(1)-Cu(1)-N(1)     | 91.58(11)  | O(2)-Cu(3)-N(7)   | 91.79(12)  |
| O(2)#1-Cu(1)-N(1)#1 | 90.58(11)  | N(6)-Cu(3)-N(7)   | 81.96(14)  |
| O(2)-Cu(1)-N(1)#1   | 89.42(11)  | O(4)-Cu(3)-N(7)   | 173.10(13) |
| O(1)#1-Cu(1)-N(1)#1 | 91.58(11)  | O(2)-Cu(3)-O(6)   | 96.06(10)  |
| O(1)-Cu(1)-N(1)#1   | 88.42(11)  | N(6)-Cu(3)-O(6)   | 81.98(13)  |
| N(1)-Cu(1)-N(1)#1   | 180.0      | O(4)-Cu(3)-O(6)   | 88.15(12)  |
| O(1)-Cu(2)-N(4)     | 172.01(12) | N(7)-Cu(3)-O(6)   | 96.52(11)  |
| O(1)-Cu(2)-O(3)     | 91.36(12)  | O(2)-Cu(3)-O(9)   | 82.86(10)  |
| N(4)-Cu(2)-O(3)     | 95.13(13)  | N(6)-Cu(3)-O(9)   | 98.57(13)  |
| O(1)-Cu(2)-N(5)     | 92.81(12)  | O(4)-Cu(3)-O(9)   | 96.46(12)  |
| N(4)-Cu(2)-N(5)     | 81.53(13)  | N(7)-Cu(3)-O(9)   | 78.97(12)  |
| O(3)-Cu(2)-N(5)     | 170.06(13) | O(6)-Cu(3)-O(9)   | 175.31(10) |
| O(1)-Cu(2)-O(5)     | 95.84(12)  | Cu(2)-O(1)-Cu(1)  | 126.88(14) |
| N(4)-Cu(2)-O(5)     | 79.06(13)  | Cu(3)-O(2)-Cu(1)  | 128.50(14) |
| O(3)-Cu(2)-O(5)     | 94.27(13)  |                   |            |

---

|                      |            |                  |            |
|----------------------|------------|------------------|------------|
| Cu(1)-N(1)           | 2.013(5)   | Cu(3)-N(8)       | 1.987(6)   |
| Cu(1)-O(1)           | 1.915(5)   | Cu(3)-O(2)       | 1.955(4)   |
| Cu(1)-O(1)#1         | 1.948(5)   | Cu(3)-O(6)       | 1.924(4)   |
| Cu(1)-O(2)           | 2.017(4)   | Cu(3)-O(12)      | 2.272(6)   |
| Cu(1)-O(3)           | 2.283(4)   | Cu(4)-O(2)       | 2.001(5)   |
| Cu(2)-N(4)           | 2.128(5)   | Cu(4)-O(3)       | 1.931(4)   |
| Cu(2)-N(5)           | 1.964(6)   | Cu(4)-O(5)       | 1.915(5)   |
| Cu(2)-O(3)           | 1.904(5)   | Cu(4)-O(7)       | 1.909(5)   |
| Cu(2)-O(4)           | 1.947(4)   | Cu(4)-O(8)       | 2.430(5)   |
| Cu(3)-N(7)           | 2.082(5)   | Cu(1)-Cu(1)#1    | 2.9128(14) |
|                      |            |                  |            |
| N(1)-Cu(1)-Cu(1)#1   | 129.75(14) | N(7)-Cu(3)-O(12) | 87.7(2)    |
| N(1)-Cu(1)-O(2)      | 92.53(19)  | N(8)-Cu(3)-N(7)  | 80.6(2)    |
| N(1)-Cu(1)-O(3)      | 92.51(18)  | N(8)-Cu(3)-O(12) | 97.2(2)    |
| O(1)#1-Cu(1)-Cu(1)#1 | 40.65(15)  | O(2)-Cu(3)-N(7)  | 90.50(19)  |
| O(1)-Cu(1)-Cu(1)#1   | 41.48(15)  | O(2)-Cu(3)-N(8)  | 164.2(2)   |
| O(1)-Cu(1)-N(1)      | 168.34(19) | O(2)-Cu(3)-O(12) | 95.4(2)    |
| O(1)#1-Cu(1)-N(1)    | 89.6(2)    | O(6)-Cu(3)-N(7)  | 170.9(2)   |
| O(1)-Cu(1)-O(1)#1    | 82.1(2)    | O(6)-Cu(3)-N(8)  | 90.7(2)    |
| O(1)-Cu(1)-O(2)      | 96.0(2)    | O(6)-Cu(3)-O(2)  | 98.61(19)  |
| O(1)#1-Cu(1)-O(2)    | 177.35(19) | O(6)-Cu(3)-O(12) | 90.9(2)    |
| O(1)-Cu(1)-O(3)      | 97.07(18)  | O(2)-Cu(4)-O(8)  | 86.52(18)  |
| O(1)#1-Cu(1)-O(3)    | 100.58(18) | O(3)-Cu(4)-O(2)  | 87.04(18)  |
| O(2)-Cu(1)-Cu(1)#1   | 137.43(14) | O(3)-Cu(4)-O(8)  | 81.68(18)  |
| O(2)-Cu(1)-O(3)      | 77.77(17)  | O(5)-Cu(4)-O(2)  | 177.2(2)   |
| O(3)-Cu(1)-Cu(1)#1   | 101.76(11) | O(5)-Cu(4)-O(3)  | 94.16(19)  |
| N(5)-Cu(2)-N(4)      | 81.9(2)    | O(5)-Cu(4)-O(8)  | 96.17(19)  |
| O(3)-Cu(2)-N(4)      | 88.7(2)    | O(7)-Cu(4)-O(2)  | 94.44(19)  |
| O(3)-Cu(2)-N(5)      | 170.6(2)   | O(7)-Cu(4)-O(3)  | 172.7(2)   |
| O(3)-Cu(2)-O(4)      | 96.87(19)  | O(7)-Cu(4)-O(5)  | 84.0(2)    |
| O(4)-Cu(2)-N(4)      | 174.0(2)   | O(7)-Cu(4)-O(8)  | 105.56(19) |
| O(4)-Cu(2)-N(5)      | 92.5(2)    |                  |            |

---

|                     |             |                     |            |
|---------------------|-------------|---------------------|------------|
| Cu(1)-O(1)          | 1.921(2)    | Cu(3)-N(9)          | 2.009(3)   |
| Cu(1)-O(3)          | 1.9246(5)   | Cu(4)-N(7)          | 1.924(3)   |
| Cu(1)-O(4)          | 1.960(3)    | Cu(4)-O(5)          | 1.939(3)   |
| Cu(1)-N(1)          | 1.963(3)    | Cu(4)-O(3)          | 1.9474(5)  |
| Cu(1)-Cu(4)#1       | 2.7429(6)   | Cu(4)-N(8)          | 1.979(3)   |
| Cu(1)-Cu(4)         | 2.7543(6)   | Cu(4)-Cu(1)#1       | 2.7428(6)  |
| Cu(1)-Cu(5)         | 2.8658(6)   | Cu(5)-O(1)          | 1.932(2)   |
| Cu(1)-Cu(3)         | 2.9529(6)   | Cu(5)-O(2)          | 1.951(2)   |
| Cu(2)-O(7)          | 1.938(2)    | Cu(5)-N(5)          | 1.956(3)   |
| Cu(2)-O(1)          | 1.939(2)    | Cu(5)-N(6)          | 1.972(3)   |
| Cu(2)-O(2)          | 1.949(2)    | Cu(6)-O(9)          | 1.930(3)   |
| Cu(2)-O(8)          | 1.951(3)    | Cu(6)-N(12)         | 1.978(3)   |
| Cu(2)-Cu(5)         | 2.9150(6)   | Cu(6)-N(13)         | 2.018(3)   |
| Cu(3)-O(1)          | 1.931(2)    | Cu(6)-O(10)         | 2.093(2)   |
| Cu(3)-N(10)         | 1.968(3)    | Cu(6)-O(2)          | 2.202(3)   |
| Cu(3)-O(6)          | 1.972(2)    |                     |            |
| O(1)-Cu(1)-Cu(4)#1  | 127.61(7)   | N(9)-Cu(3)-Cu(1)    | 121.07(8)  |
| O(3)-Cu(1)-Cu(4)#1  | 45.235(16)  | N(7)-Cu(4)-O(5)     | 163.99(12) |
| O(4)-Cu(1)-Cu(4)#1  | 105.51(8)   | N(7)-Cu(4)-O(3)     | 96.83(12)  |
| N(1)-Cu(1)-Cu(4)#1  | 84.64(8)    | O(5)-Cu(4)-O(3)     | 92.05(12)  |
| O(1)-Cu(1)-Cu(4)    | 142.64(7)   | N(7)-Cu(4)-N(8)     | 84.16(12)  |
| O(3)-Cu(1)-Cu(4)    | 44.991(16)  | O(5)-Cu(4)-N(8)     | 92.83(12)  |
| O(4)-Cu(1)-Cu(4)    | 83.47(8)    | O(3)-Cu(4)-N(8)     | 157.06(10) |
| N(1)-Cu(1)-Cu(4)    | 89.57(8)    | N(7)-Cu(4)-Cu(1)#1  | 81.58(8)   |
| Cu(4)#1-Cu(1)-Cu(4) | 89.698(17)  | O(5)-Cu(4)-Cu(1)#1  | 95.68(8)   |
| O(1)-Cu(1)-Cu(5)    | 42.08(6)    | O(3)-Cu(4)-Cu(1)#1  | 44.563(15) |
| O(3)-Cu(1)-Cu(5)    | 145.94(3)   | N(8)-Cu(4)-Cu(1)#1  | 156.33(9)  |
| O(4)-Cu(1)-Cu(5)    | 86.49(8)    | N(7)-Cu(4)-Cu(1)    | 114.64(9)  |
| N(1)-Cu(1)-Cu(5)    | 84.78(8)    | O(5)-Cu(4)-Cu(1)    | 80.92(8)   |
| Cu(4)#1-Cu(1)-Cu(5) | 164.85(2)   | O(3)-Cu(4)-Cu(1)    | 44.323(15) |
| Cu(4)-Cu(1)-Cu(5)   | 101.042(17) | N(8)-Cu(4)-Cu(1)    | 114.66(9)  |
| O(1)-Cu(1)-Cu(3)    | 40.09(6)    | Cu(1)#1-Cu(4)-Cu(1) | 88.524(17) |
| O(3)-Cu(1)-Cu(3)    | 134.83(4)   | O(1)-Cu(5)-O(2)     | 82.22(10)  |
| O(4)-Cu(1)-Cu(3)    | 115.00(8)   | O(1)-Cu(5)-N(5)     | 99.13(10)  |
| N(1)-Cu(1)-Cu(3)    | 71.17(8)    | O(2)-Cu(5)-N(5)     | 173.99(11) |
| Cu(4)#1-Cu(1)-Cu(3) | 90.786(17)  | O(1)-Cu(5)-N(6)     | 173.98(11) |
| Cu(4)-Cu(1)-Cu(3)   | 160.60(2)   | O(2)-Cu(5)-N(6)     | 95.29(11)  |
| Cu(5)-Cu(1)-Cu(3)   | 75.527(15)  | N(5)-Cu(5)-N(6)     | 83.92(12)  |

|                   |            |                   |            |
|-------------------|------------|-------------------|------------|
| O(7)-Cu(2)-O(1)   | 98.72(10)  | O(1)-Cu(5)-Cu(1)  | 41.79(7)   |
| O(7)-Cu(2)-O(2)   | 177.66(11) | O(2)-Cu(5)-Cu(1)  | 103.08(7)  |
| O(1)-Cu(2)-O(2)   | 82.06(10)  | N(5)-Cu(5)-Cu(1)  | 74.63(8)   |
| O(7)-Cu(2)-O(8)   | 86.52(11)  | N(6)-Cu(5)-Cu(1)  | 144.20(9)  |
| O(1)-Cu(2)-O(8)   | 174.39(10) | O(1)-Cu(5)-Cu(2)  | 41.25(7)   |
| O(2)-Cu(2)-O(8)   | 92.78(10)  | O(2)-Cu(5)-Cu(2)  | 41.61(7)   |
| O(7)-Cu(2)-Cu(5)  | 139.41(8)  | N(5)-Cu(5)-Cu(2)  | 138.53(8)  |
| O(1)-Cu(2)-Cu(5)  | 41.05(6)   | N(6)-Cu(5)-Cu(2)  | 136.83(9)  |
| O(2)-Cu(2)-Cu(5)  | 41.65(7)   | Cu(1)-Cu(5)-Cu(2) | 66.262(15) |
| O(8)-Cu(2)-Cu(5)  | 133.51(8)  | O(9)-Cu(6)-N(12)  | 168.02(11) |
| O(1)-Cu(3)-N(10)  | 99.74(10)  | O(9)-Cu(6)-N(13)  | 89.53(13)  |
| O(1)-Cu(3)-O(6)   | 89.18(10)  | N(12)-Cu(6)-N(13) | 81.55(13)  |
| N(10)-Cu(3)-O(6)  | 170.62(11) | O(9)-Cu(6)-O(10)  | 90.33(11)  |
| O(1)-Cu(3)-N(9)   | 159.57(11) | N(12)-Cu(6)-O(10) | 95.98(11)  |
| N(10)-Cu(3)-N(9)  | 81.54(11)  | N(13)-Cu(6)-O(10) | 163.71(12) |
| O(6)-Cu(3)-N(9)   | 89.08(11)  | O(9)-Cu(6)-O(2)   | 94.87(10)  |
| O(1)-Cu(3)-Cu(1)  | 39.83(7)   | N(12)-Cu(6)-O(2)  | 95.98(11)  |
| N(10)-Cu(3)-Cu(1) | 114.22(8)  | N(13)-Cu(6)-O(2)  | 113.10(11) |
| O(6)-Cu(3)-Cu(1)  | 71.08(8)   | O(10)-Cu(6)-O(2)  | 83.13(9)   |

---

**Table 2S.** Bond valence sums for Cu<sup>a</sup> and selected oxygen<sup>b</sup> atoms in **1–3**.

| Complex 1 |       |                  |
|-----------|-------|------------------|
| Atom      | Cu(I) | Cu(II)           |
| Cu1       | 1.66  | <u>1.93</u>      |
| Cu2       | 1.64  | <u>2.02</u>      |
| Cu3       | 1.64  | <u>2.01</u>      |
|           | BVS   | assignment       |
| O1        | 0.86  | OH <sup>-</sup>  |
| O2        | 0.91  | OH <sup>-</sup>  |
| O3        | 0.41  | H <sub>2</sub> O |
| O4        | 0.40  | H <sub>2</sub> O |

| Complex 2 |       |                 |
|-----------|-------|-----------------|
| Atom      | Cu(I) | Cu(II)          |
| Cu1       | 1.68  | <u>1.96</u>     |
| Cu2       | 1.60  | <u>1.96</u>     |
| Cu3       | 1.66  | <u>2.03</u>     |
| Cu4       | 1.76  | <u>1.95</u>     |
|           | BVS   | assignment      |
| O1        | 1.19  | OH <sup>-</sup> |
| O2        | 1.14  | OH <sup>-</sup> |
| O3        | 0.92  | OH <sup>-</sup> |

| Complex 3 |       |                 |
|-----------|-------|-----------------|
| Atom      | Cu(I) | Cu(II)          |
| Cu1       | 1.65  | <u>1.95</u>     |
| Cu2       | 1.62  | <u>1.80</u>     |
| Cu3       | 1.56  | <u>1.94</u>     |
| Cu4       | 1.66  | <u>2.07</u>     |
| Cu5       | 1.62  | <u>2.02</u>     |
| Cu6       | 1.63  | <u>2.02</u>     |
|           | BVS   | assignment      |
| O1        | 1.87  | O <sup>2-</sup> |
| O2        | 1.10  | OH <sup>-</sup> |
| O3        | 1.84  | O <sup>2-</sup> |

<sup>a</sup>The underlined value is the one closest to the charge for which it was calculated. The oxidation state is the nearest whole number to the underlined value. <sup>b</sup>A BVS in the ~1.8–2.0, ~1.0–1.2, and ~0.2–0.4 ranges for an O atom is indicative of non-, single- and double-protonation, respectively, but can be altered somewhat by hydrogen bonding.

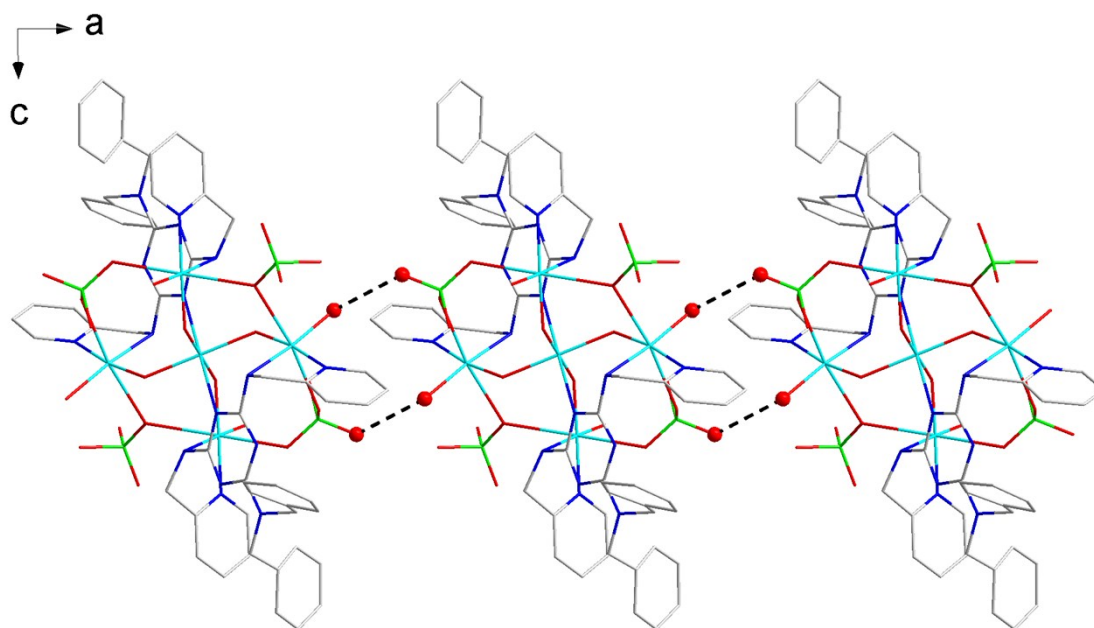

**Fig. 1S.** Representations of Cu<sub>5</sub>-based 1D supramolecular structure of **1** showing along the *b* axis. Hydrogen atoms have been omitted for clarity.



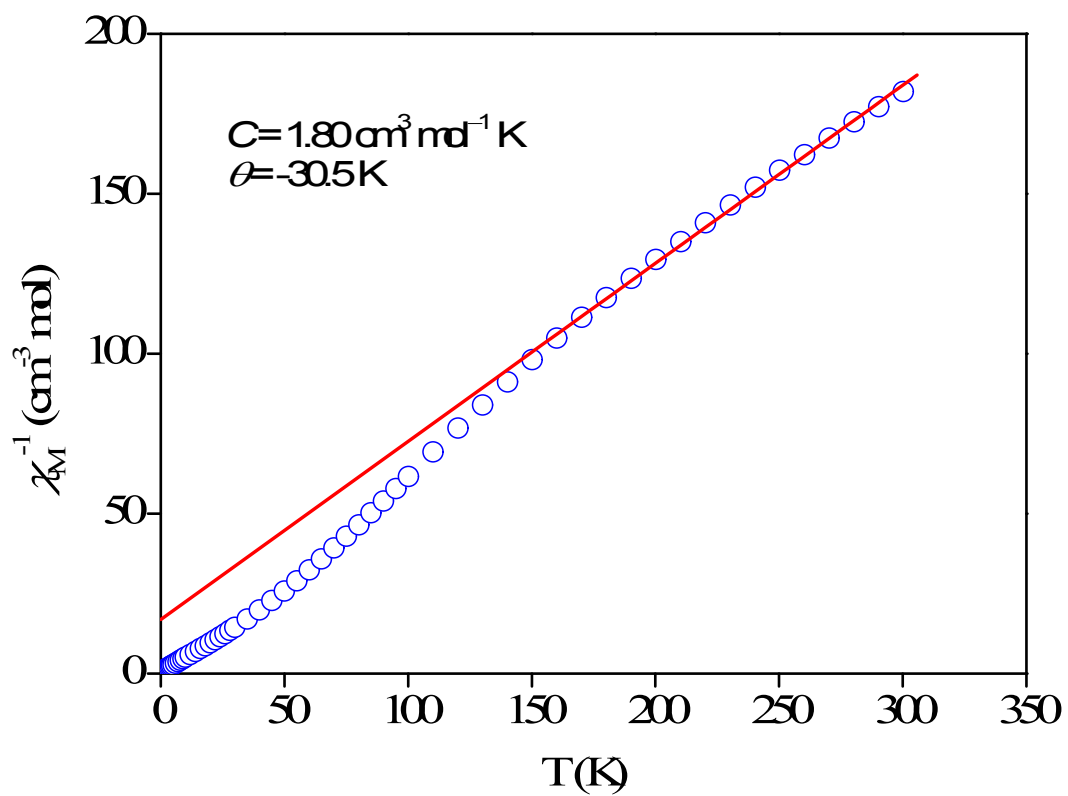

**Fig. 2S.** Plot of  $\chi_M^{-1}$  (○) vs. temperature for a microcrystalline sample of complex **1**. The solid line represents the best fit  $\chi_M^{-1}$  above 150 K with a Curie–Weiss law.

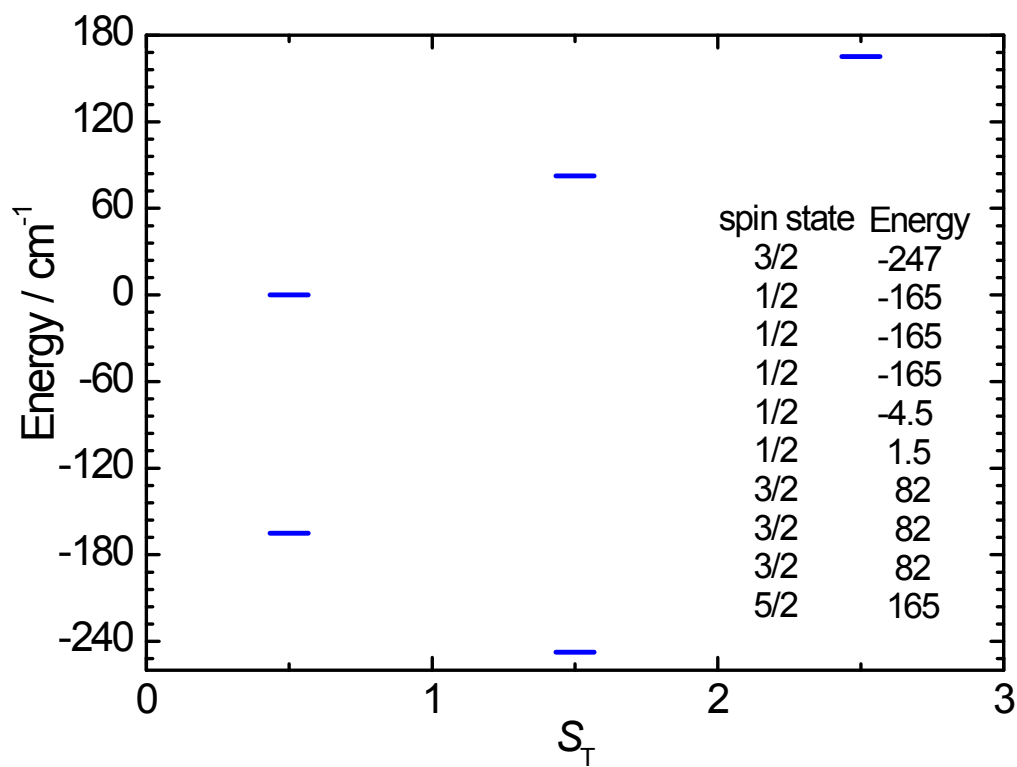

**Fig. 3S.** Diagram of all energy values for all  $S_T$  spin states of complex **1**.

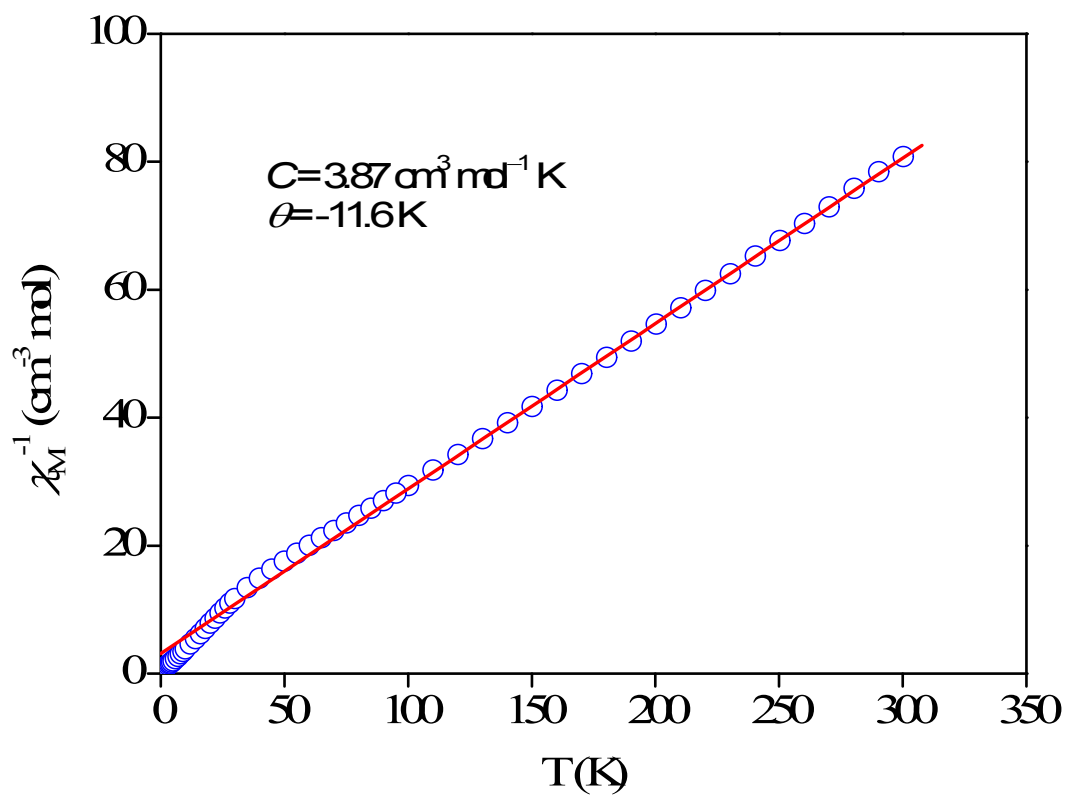

**Fig. 4S.** Plot of  $\chi_M^{-1}$  (○) vs. temperature for a microcrystalline sample of complex **2**. The solid line represents the best fit  $\chi_M^{-1}$  above 100 K with a Curie–Weiss law.

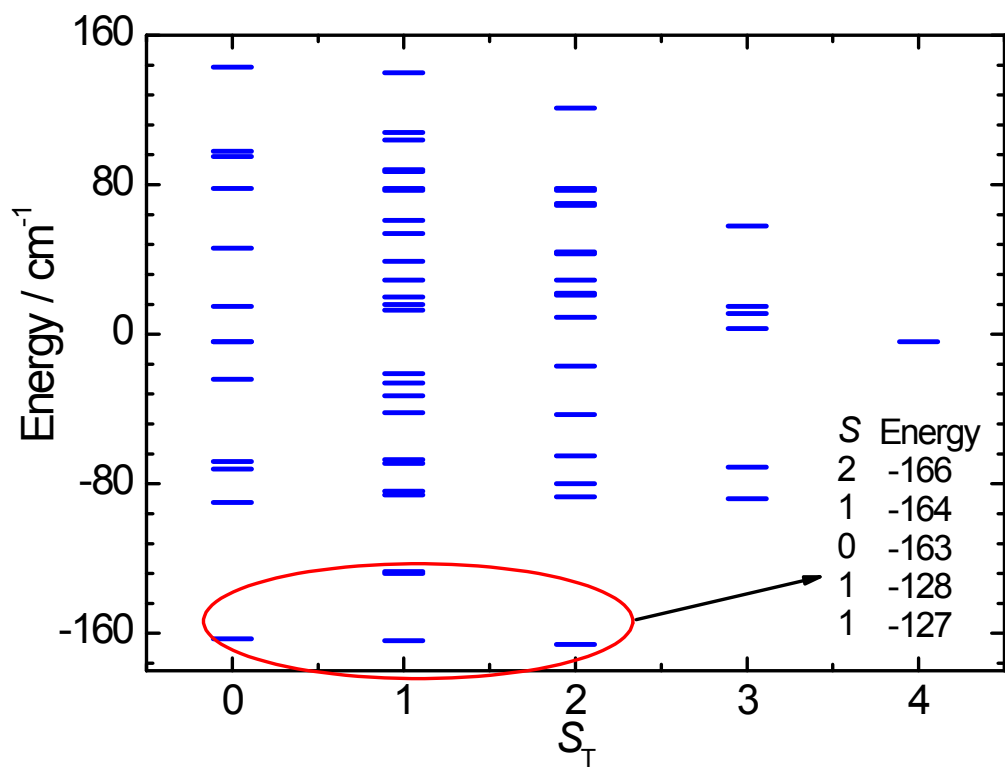

**Fig. 5S.** Diagram of all energy values for all  $S_T$  spin states of complex 2.

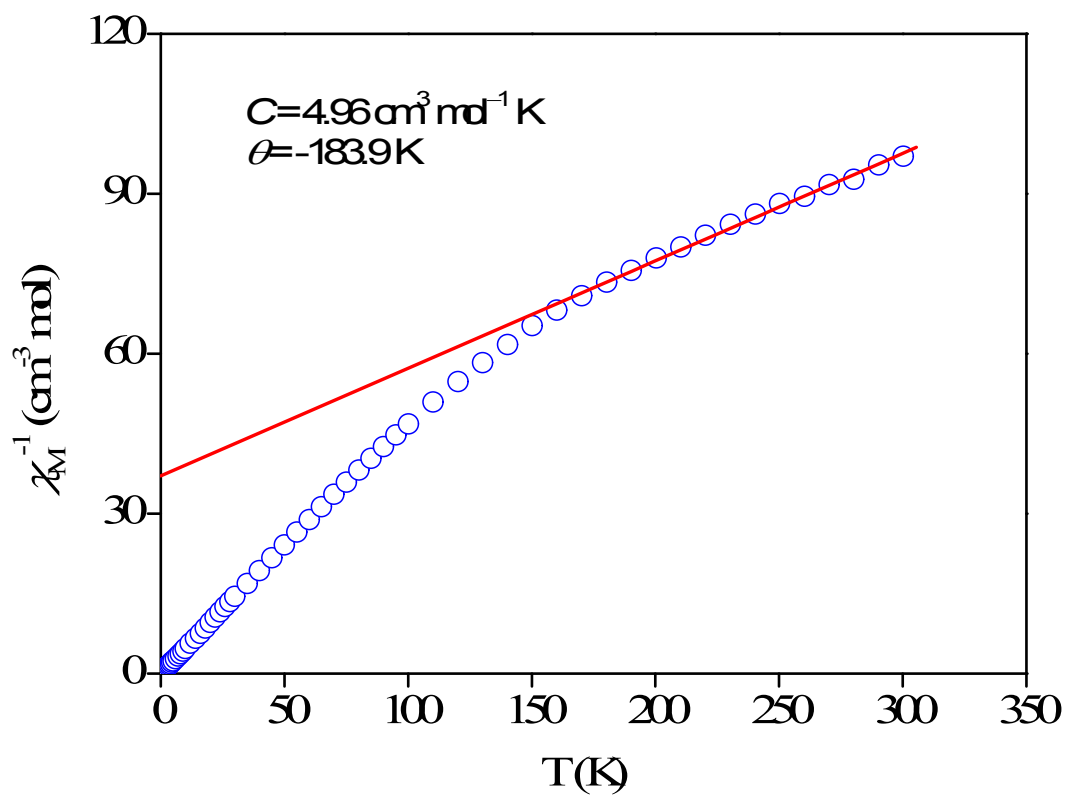

**Fig. 6S.** Plot of  $\chi_M^{-1}$  (○) vs. temperature for a microcrystalline sample of complex **3**. The solid line represents the best fit  $\chi_M^{-1}$  above 160 K with a Curie–Weiss law.
